# Supplementary material for: Deciphering nonlinear optical properties in functionalized hexaphyrins via explainable machine learning
Source: Royal Society of Chemistry journal article supplement (doi:10.1039/d4cp03303e), 2024-11-07
Supplement: d4cp03303e5.pdf [file d4cp03303e5.pdf]

# Identifying Contributions Responsible for the Nonlinear Optical Property Differences in Functionalized Hexaphyrins with Explainable Machine-Learning Methods.

Eline Desmedt, Michiel Jacobs, Mercedes Alonso,\* and Freija De Vleeschouwer\*

*Department of General Chemistry: Algemene Chemie (ALGC), Vrije Universiteit Brussel,  
Pleinlaan 2, 1050 Brussel, Belgium*

E-mail: Mercedes.Alonso.Giner@vub.be; Freija.De.Vleeschouwer@vub.be

# Contents

|                                              |           |
|----------------------------------------------|-----------|
| <b>Depolarization ratio</b> . . . . .        | <b>3</b>  |
| <b>Training and Test set</b> . . . . .       | <b>3</b>  |
| <b>Hyperparameters</b> . . . . .             | <b>4</b>  |
| <b>Feature importance analysis</b> . . . . . | <b>4</b>  |
| <b>SHAP analysis: Test set</b> . . . . .     | <b>7</b>  |
| <b>Dependency plots</b> . . . . .            | <b>8</b>  |
| <b>Force plots</b> . . . . .                 | <b>9</b>  |
| <b>External test sets</b> . . . . .          | <b>11</b> |
| Oudar and Chemla's model . . . . .           | 11        |
| Truth of predictions plots . . . . .         | 12        |
| Dependency plots . . . . .                   | 13        |

## Depolarization ratio

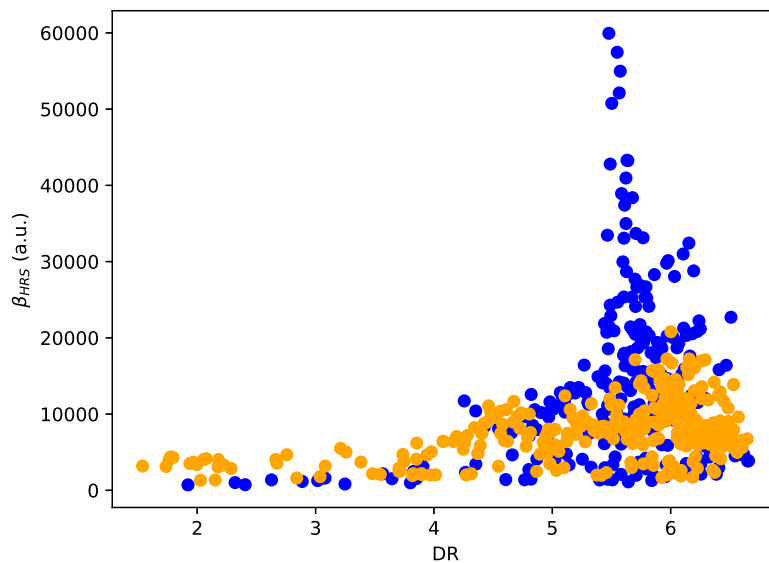

Figure S1: Scatter plot of the  $\beta_{HRS}$  response in a.u. versus the depolarization ratio DR. Data points are colored in blue and orange for [26]- and [30]-hexaphyrins, respectively.

## Training and Test set

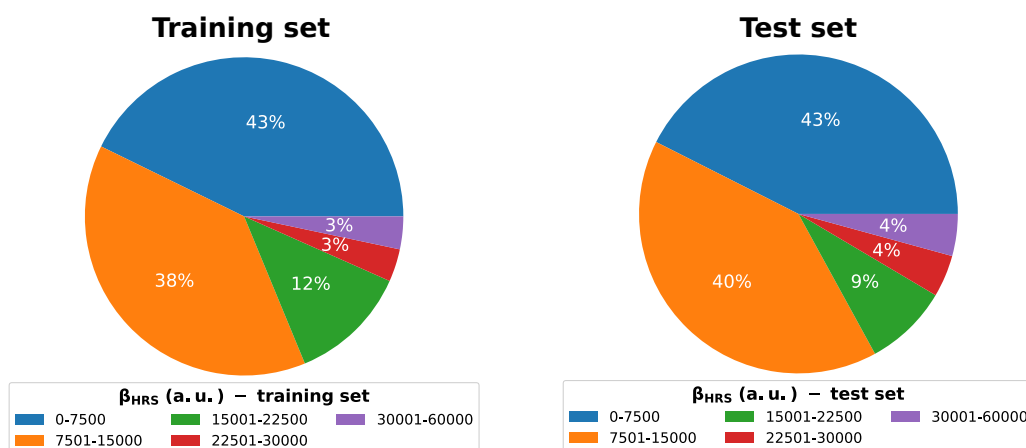

Figure S2: Pie diagram of the  $\beta_{HRS}$  response of the training (left) and test (right) set divided into groups ranging 7500 a.u.

# Hyperparameters

**Table S1: Tuned hyperparameters of all generated models.**

| Model            | Kernel     | $\alpha$             | degree | $\gamma$            | coef0              |
|------------------|------------|----------------------|--------|---------------------|--------------------|
| Model 1 -        | polynomial | 0.21596172262555952  | 3      | 0.39811283148884463 | 0.6620232579248944 |
| Model 9 features | polynomial | 0.3534700903458985   | 4      | 0.10972086480126685 | 1.8307728246239008 |
| Model 8 features | polynomial | 0.21237948689683517  | 4      | 0.10168244123472461 | 1.8873825033896925 |
| Model 7 features | polynomial | 0.042812608257912776 | 4      | 0.11284573203779522 | 1.3081768404916778 |
| Model 2          | polynomial | 0.23397666361424996  | 4      | 0.21964487154491796 | 1.726214658320214  |
| Model 5 features | polynomial | 0.2732328568080413   | 4      | 0.2840189622843563  | 1.8402448087866812 |

## Feature importance analysis

As we suspected in the main manuscript that Model 1 is overfit, we applied a strategy based on feature importances and MAE changes to carefully select and omit features from our next model. At closer inspection of Table 4 in the main manuscript, which contains the feature importances of Model 1, we observe that  $|\Delta\mu|$  has the lowest feature importance of all ten features. Given its low importance,  $|\Delta\mu|$  is removed from the feature set and a new model is trained with only 9 features. Even though the MAE values of the full training and test sets increase slightly by around 30 a.u., the MAE of the cross-validation set significantly drops, as displayed in Figure S3 by the bar plot on the one hand (left-hand axis) and the line plot showing the difference in MAE between the current model and its predecessor on the other hand (right-hand axis). Thus, it is decided to omit  $|\Delta\mu|$  from the input features. For the next model, we remove BOA as this descriptor shows the lowest feature importance (Table S3). Based on the drop in MAE for the test set, the minimal MAE increase for the training set and the cross-validation set performing not much worse than Model 1, BOA removal is confirmed. We continue the same procedure by evaluating changes in model statistics for training, cross-validation and test sets. After consecutively removing 4 features with respect to Model 1, we finally see a big jump in MAE for the model with 5 features having eliminated  $\Delta_L$ . This increase is quite significant for all sets (training, cross-validation and test). We

thus opted to continue with the model with 6 features, hereafter named as Model 2 (cf. main manuscript) and containing the following input features:  $\Delta_{\text{HL}}$ ,  $q_{\text{CT}}$ ,  $\Delta_{\text{L}}$ ,  $\mu_{01}$ ,  $\Delta E_{S1}$ , and  $D_{\text{CT}}$ .

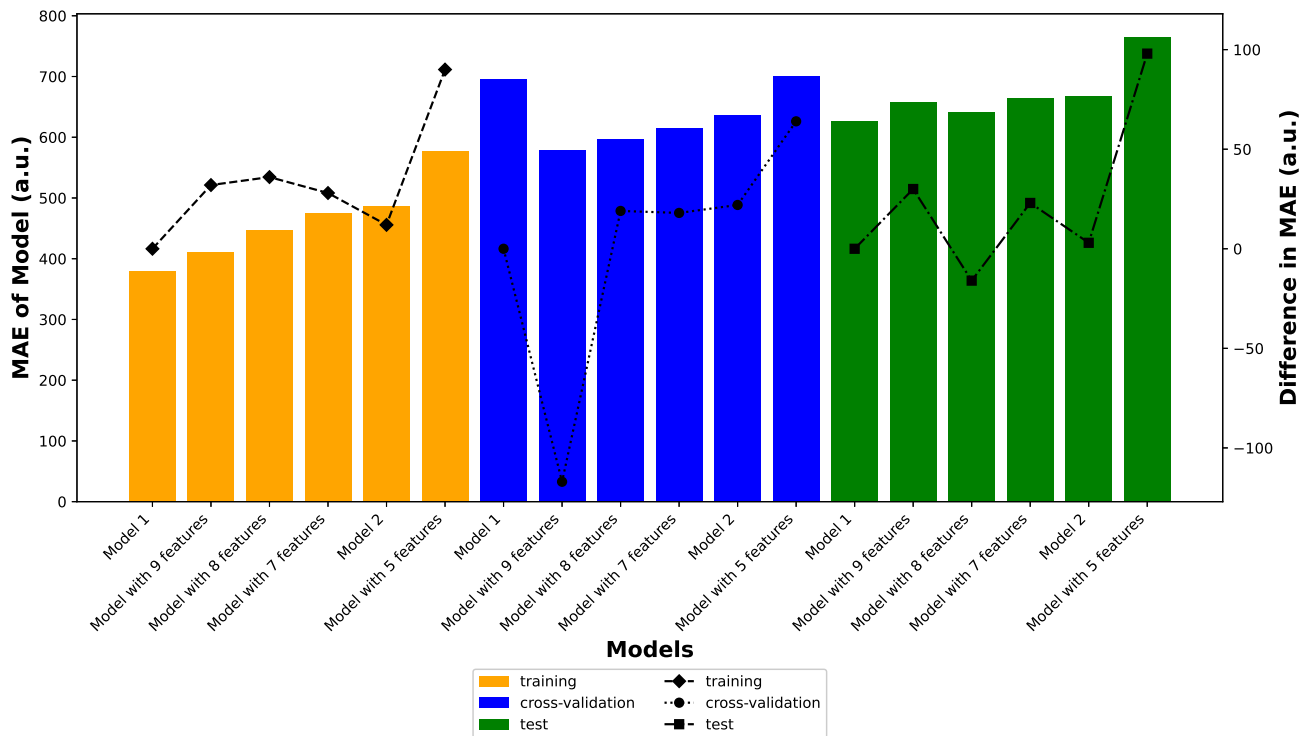

Figure S3: Model statistics after feature importance analysis for training set, cross-validation set and test set. As referred to the left-hand axis, the MAE of every consecutive model is displayed as a bar plot for all three data sets. As referred to the right-hand axis, the MAE change between the current and previous models (differing in 1 input feature) is plotted as a line plot. Note the difference in scale and level 0 for both axes.

Table S2: MAE of training, cross-validation and test set of the additional models.

| Models           | MAE (Train) | MAE (cross-validation) | MAE (Test) in a.u. |
|------------------|-------------|------------------------|--------------------|
| Model 1          | 379         | 695                    | 627                |
| Model 9 features | 411         | 578                    | 657                |
| Model 8 features | 447         | 597                    | 641                |
| Model 7 features | 475         | 615                    | 664                |
| Model 2          | 487         | 637                    | 667                |
| Model 5 features | 577         | 701                    | 765                |

**Table S3: Feature permutation importance of additional models with the differences in statistics between the actual dataset together with the permuted datasets and their standard deviations in a.u.**

| Model 9 features        | $\Delta\text{MAE (Train)}$ | $\Delta\text{MAE (Test)}$ |
|-------------------------|----------------------------|---------------------------|
| $\Delta_{\text{HL}}$    | $1843 \pm 77$              | $1731 \pm 134$            |
| $D_{\text{CT}}$         | $4151 \pm 144$             | $3901 \pm 236$            |
| $\Delta_{\text{L+1.H}}$ | $1240 \pm 48$              | $911 \pm 87$              |
| $\Delta_{\text{L}}$     | $1805 \pm 80$              | $1721 \pm 149$            |
| $\mu_{01}$              | $1560 \pm 64$              | $1375 \pm 100$            |
| $q_{\text{CT}}$         | $2009 \pm 85$              | $1642 \pm 177$            |
| $\Delta E_{S1}$         | $1348 \pm 52$              | $1207 \pm 92$             |
| BOA                     | $765 \pm 51$               | $570 \pm 81$              |
| $\mu$                   | $863 \pm 42$               | $653 \pm 68$              |
| Model 8 features        | $\Delta\text{MAE (Train)}$ | $\Delta\text{MAE (Test)}$ |
| $\Delta_{\text{HL}}$    | $1996 \pm 139$             | $2074 \pm 87$             |
| $D_{\text{CT}}$         | $3958 \pm 139$             | $3770 \pm 223$            |
| $\Delta_{\text{L+1.H}}$ | $1363 \pm 52$              | $1117 \pm 90$             |
| $\Delta_{\text{L}}$     | $1926 \pm 88$              | $1886 \pm 151$            |
| $\mu_{01}$              | $1873 \pm 75$              | $1683 \pm 127$            |
| $q_{\text{CT}}$         | $1940 \pm 77$              | $1649 \pm 154$            |
| $\Delta E_{S1}$         | $1312 \pm 54$              | $1187 \pm 106$            |
| $\mu$                   | $940 \pm 46$               | $780 \pm 74$              |
| Model 7 features        | $\Delta\text{MAE (Train)}$ | $\Delta\text{MAE (Test)}$ |
| $\Delta_{\text{HL}}$    | $1825 \pm 84$              | $1647 \pm 141$            |
| $D_{\text{CT}}$         | $4338 \pm 183$             | $4121 \pm 320$            |
| $\Delta_{\text{L+1.H}}$ | $1284 \pm 44$              | $1172 \pm 77$             |
| $\Delta_{\text{L}}$     | $1753 \pm 85$              | $1750 \pm 157$            |
| $\mu_{01}$              | $2804 \pm 130$             | $2719 \pm 227$            |
| $q_{\text{CT}}$         | $2134 \pm 110$             | $1661 \pm 202$            |
| $\Delta E_{S1}$         | $1951 \pm 83$              | $1846 \pm 169$            |
| Model 2                 | $\Delta\text{MAE (Train)}$ | $\Delta\text{MAE (Test)}$ |
| $\Delta_{\text{HL}}$    | $4735 \pm 186$             | $4347 \pm 295$            |
| $D_{\text{CT}}$         | $4730 \pm 214$             | $4498 \pm 360$            |
| $\Delta_{\text{L}}$     | $1247 \pm 72$              | $1043 \pm 106$            |
| $\mu_{01}$              | $2982 \pm 154$             | $2898 \pm 267$            |
| $q_{\text{CT}}$         | $2152 \pm 133$             | $1776 \pm 243$            |
| $\Delta E_{S1}$         | $2028 \pm 90$              | $1960 \pm 195$            |

# SHAP analysis: Test set

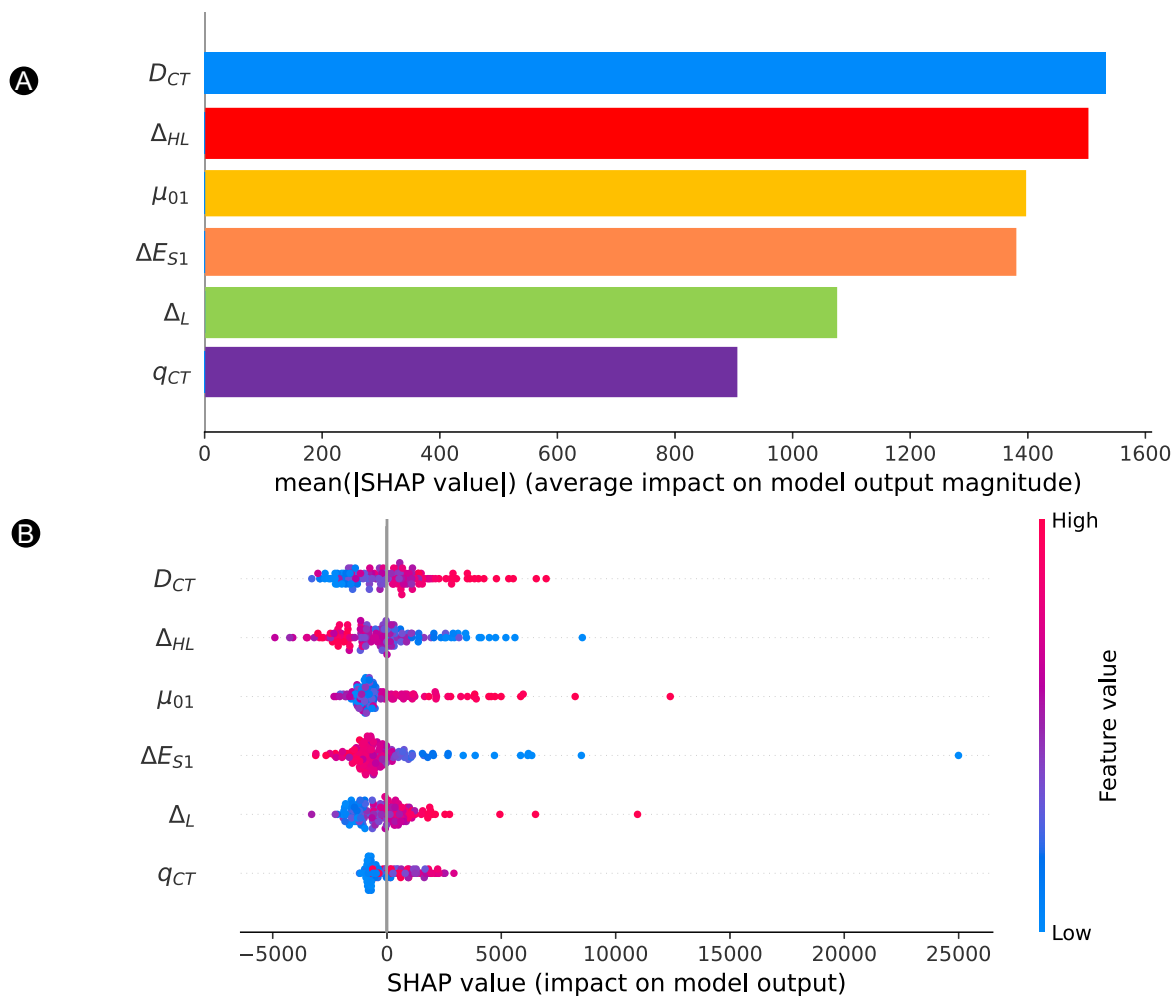

Figure S4: SHAP analysis of Model 2. (A) Bar plot containing the mean absolute SHAP value for each feature over all test set samples. (B) Beeswarm plot with SHAP values of all test set datapoints while highlighting the feature value.

# Dependency plots

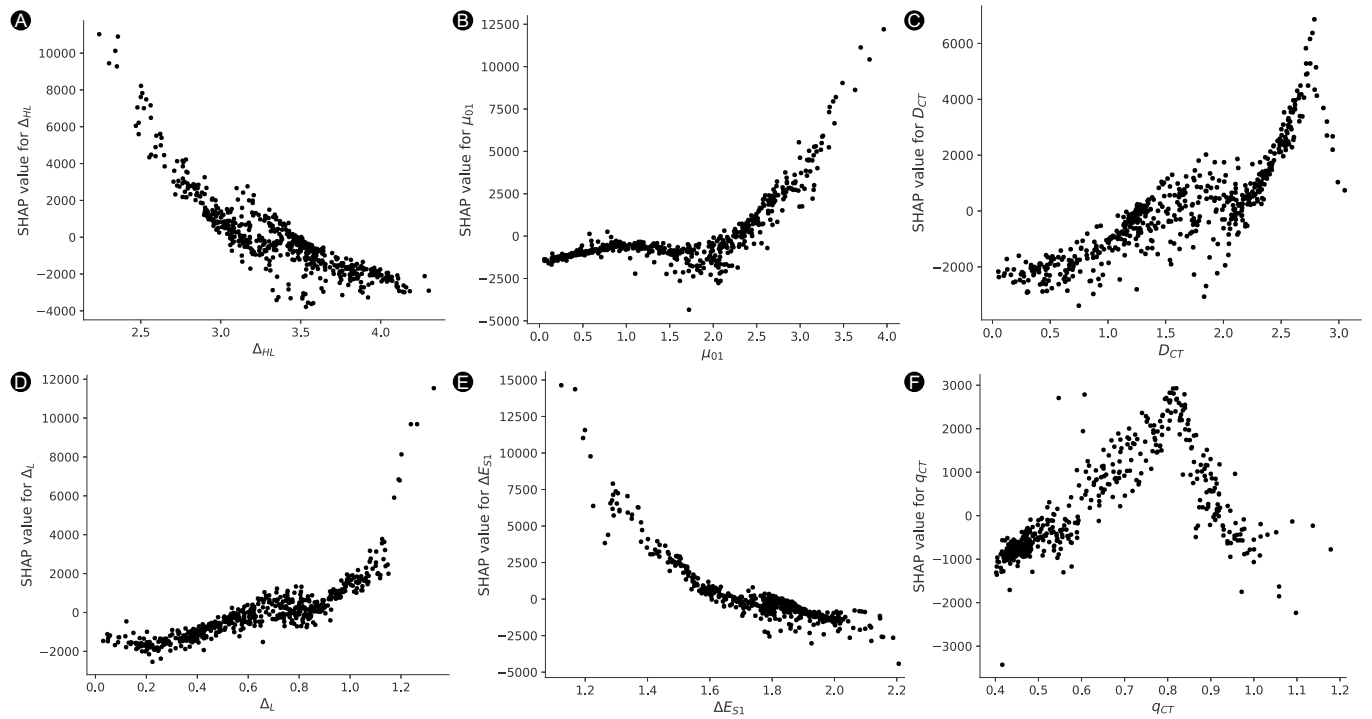

Figure S5: Dependency plots highlighting the feature SHAP *versus* the feature value for (A)  $\Delta_{HL}$  (B)  $\mu_{01}$ , (C)  $D_{CT}$ , (D)  $\Delta_L$ , (E)  $\Delta E_{S1}$  and (F)  $q_{CT}$ .



# Force plots

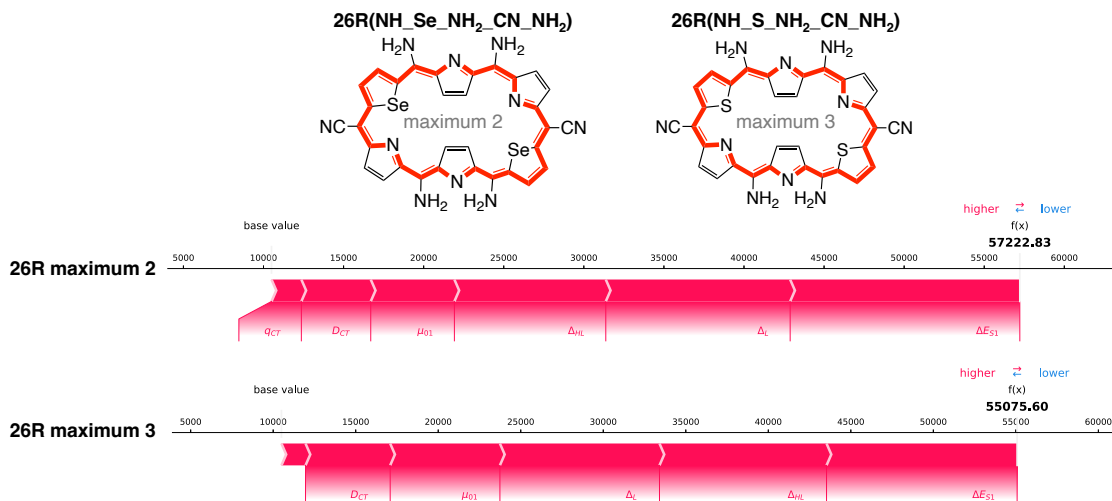

Figure S6: Force plot of the **26R** system with the second and third maximal  $\beta_{HRS}$  response denoted as **26R(NH\_Se\_NH<sub>2</sub>\_CN\_NH<sub>2</sub>)** and **26R(NH\_S\_NH<sub>2</sub>\_CN\_NH<sub>2</sub>)**, respectively. Features highlighted in red positively contribute with respect to the base value, while those highlighted in blue lower the NLO response prediction.

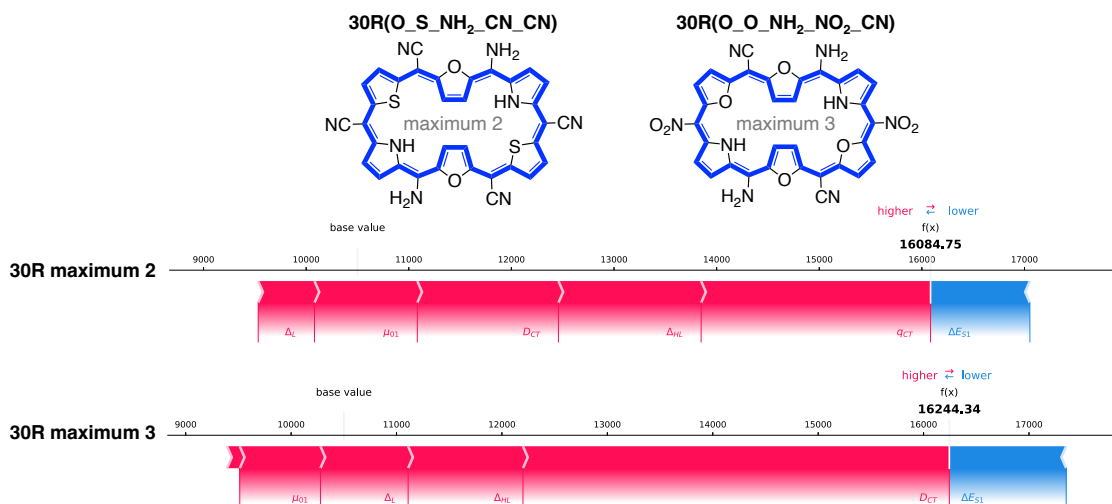

Figure S7: Force plot of the **30R** system with the second and third maximal  $\beta_{HRS}$  response denoted as **30R(O\_S\_NH<sub>2</sub>\_CN\_CN)** and **30R(O\_O\_NH<sub>2</sub>\_NO<sub>2</sub>\_CN)**, respectively. Features highlighted in red positively contribute with respect to the base value, while those highlighted in blue lower the NLO response prediction.

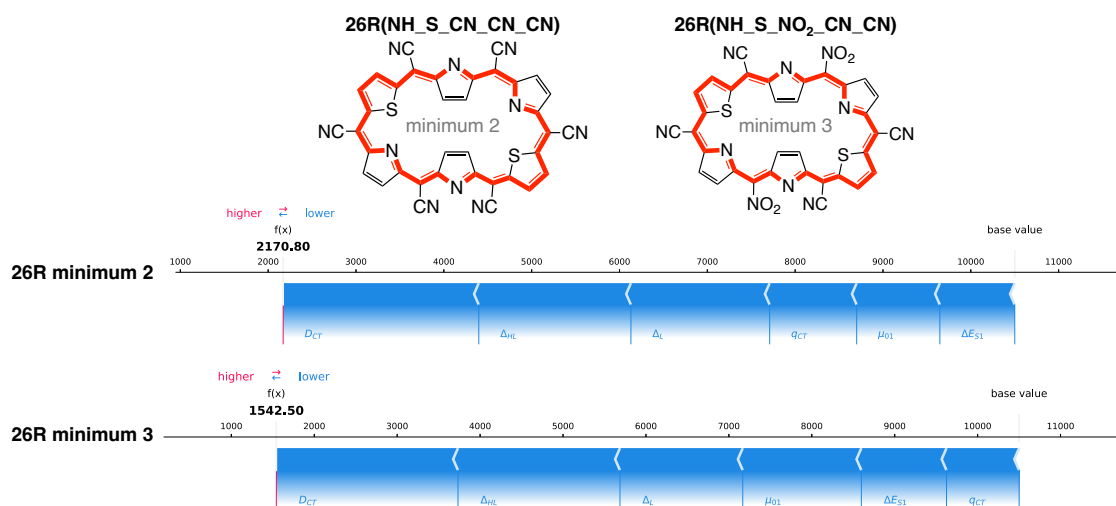

Figure S8: Force plot of the **26R** system with the second and third minimal  $\beta_{HRS}$  response denoted as **26R(NH\_S\_CN\_CN\_CN)** and **26R(NH\_S\_NO<sub>2</sub>\_CN\_CN)**, respectively. Features highlighted in red positively contribute with respect to the base value, while those highlighted in blue lower the NLO response prediction.

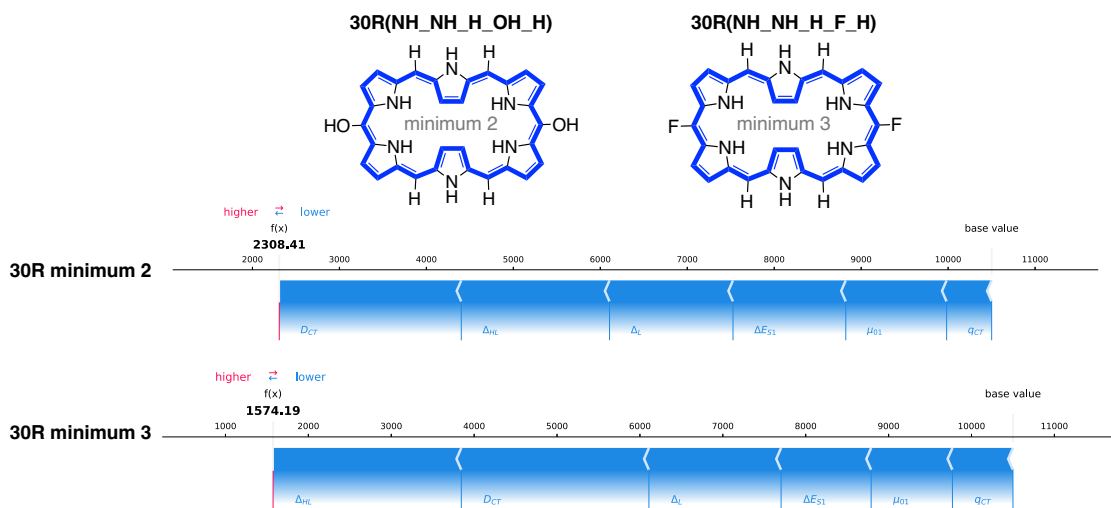

Figure S9: Force plot of the **30R** system with the second and third minimal  $\beta_{HRS}$  response denoted as **30R(NH\_NH\_H\_OH\_H)** and **30R(NH\_NH\_H\_F\_H)**, respectively. Features highlighted in red positively contribute with respect to the base value, while those highlighted in blue lower the NLO response prediction.

# External test sets

## Oudar and Chemla's model

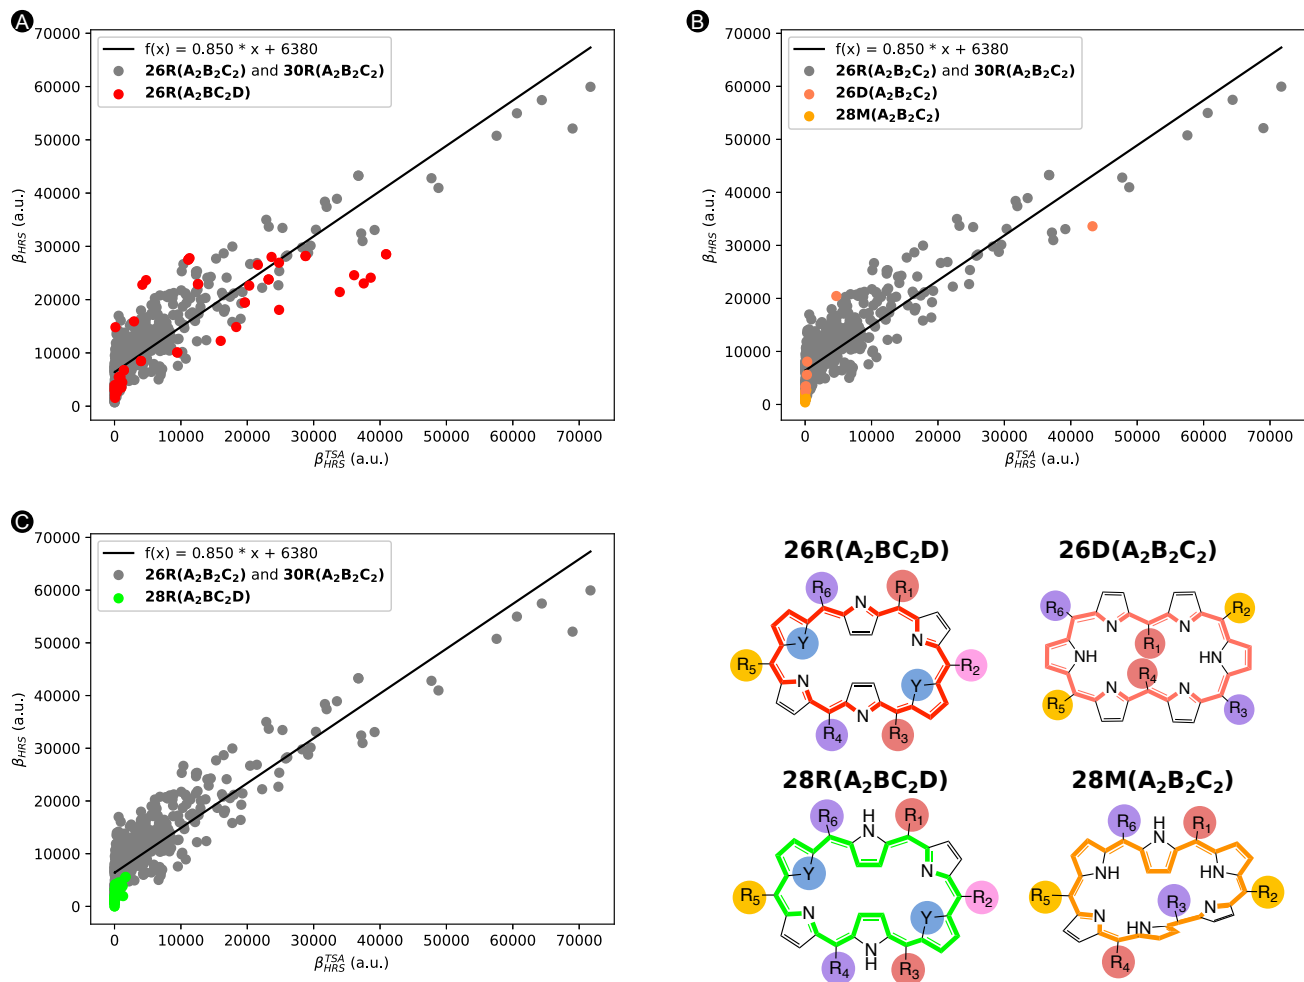

Figure S10: Scatter plot of the  $\beta_{HRS}$  response (in a.u.) versus the  $\beta_{HRS}^{TSA}$  (in a.u.). The linear regression line is portrayed by solid black line and its mathematical expression is given in the box. Data points from the initial dataset are highlighted in grey, but each new test set is coloured in red, salmon, orange and green for **26R(A<sub>2</sub>BC<sub>2</sub>D)**, **26D(A<sub>2</sub>B<sub>2</sub>C<sub>2</sub>)**, **28M(A<sub>2</sub>B<sub>2</sub>C<sub>2</sub>)** and **28R(A<sub>2</sub>BC<sub>2</sub>D)**, respectively.

## Truth of predictions plots

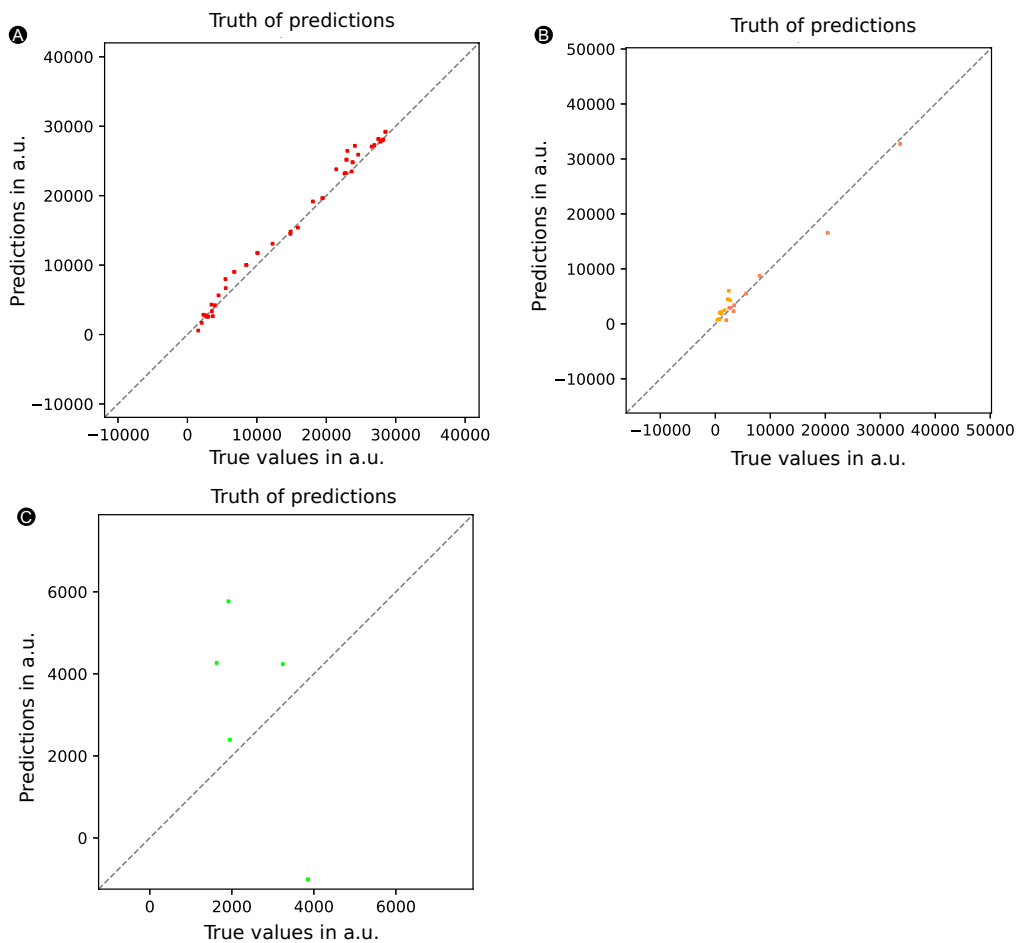

Figure S11: Truth of predictions plot: Scatter plot of True values (*i.e.*,  $\beta_{HRS}$  based on quantum chemical calculations) and Predictions ( $\beta_{HRS}$  predicted by Model 2) on the new test sets (A) **26R(A<sub>2</sub>BC<sub>2</sub>D)**, (B) **26D(A<sub>2</sub>B<sub>2</sub>C<sub>2</sub>) + 28M(A<sub>2</sub>B<sub>2</sub>C<sub>2</sub>)**, and (C) **28R(A<sub>2</sub>BC<sub>2</sub>D)**.

## Dependency plots

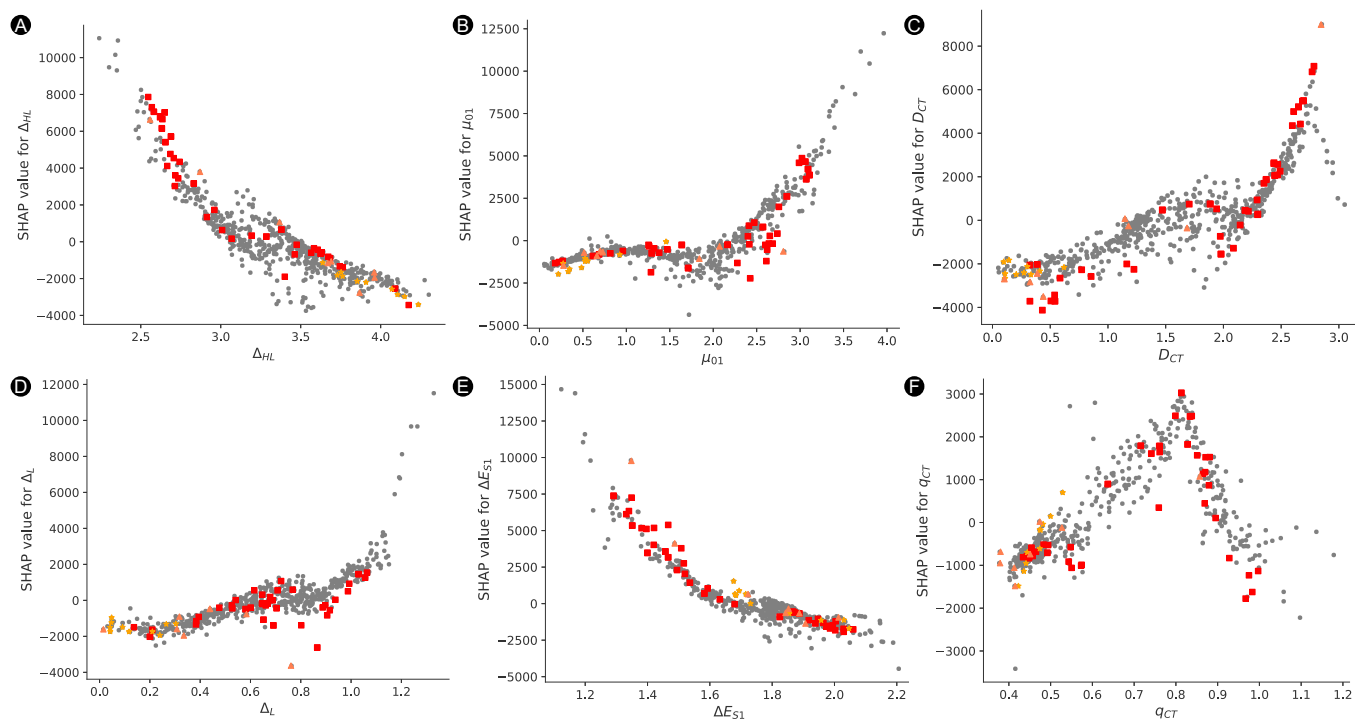

Figure S12: Dependency plots highlighting the feature SHAP *versus* the feature value for (A)  $\Delta_{HL}$  (B)  $\mu_{01}$ , (C)  $D_{CT}$ , (D)  $\Delta_L$ , (E)  $\Delta_{L+1.H}$  and (F)  $q_{CT}$ . Data points from the initial dataset are highlighted in grey, but each new test set is coloured in red, salmon, and orange for **26R(A<sub>2</sub>BC<sub>2</sub>D)**, **26D(A<sub>2</sub>B<sub>2</sub>C<sub>2</sub>)**, and **28M(A<sub>2</sub>B<sub>2</sub>C<sub>2</sub>)**, respectively.
